# Supplementary figures and images for: Global epistasis emerges from a generic model of a complex trait
Source: eLife journal article supplement (doi:10.7554/elife.64740), 2021-03-29

**a**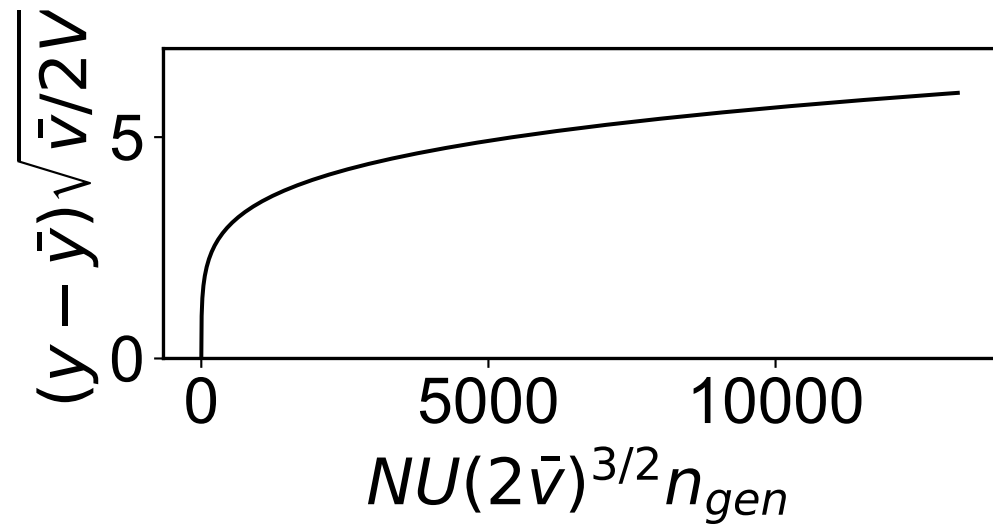**b**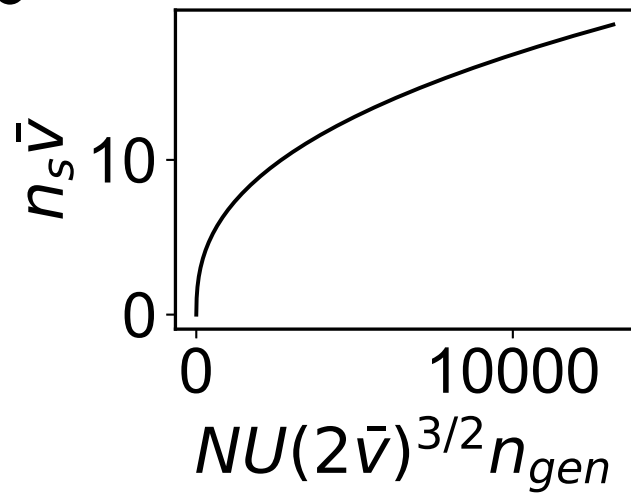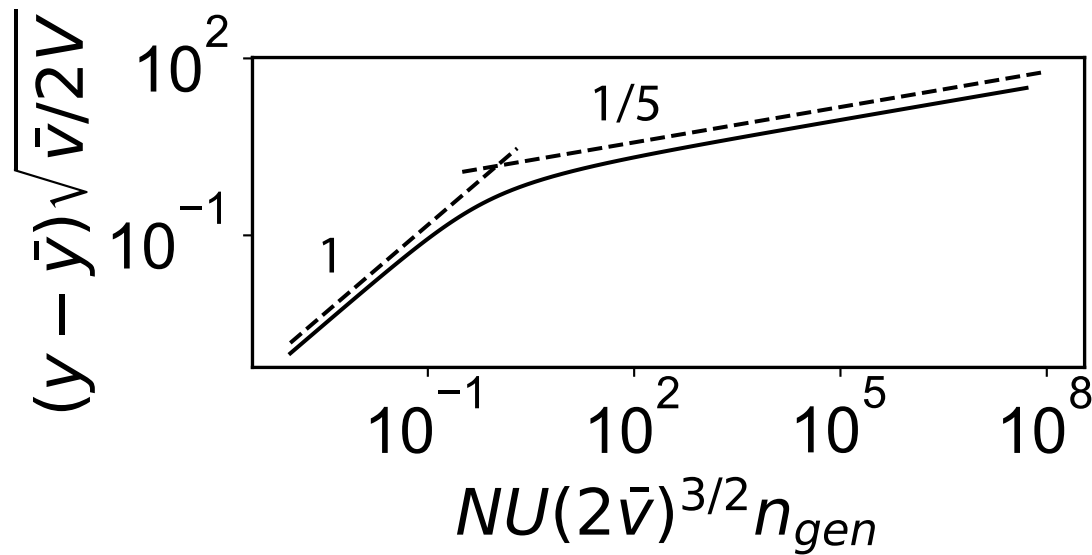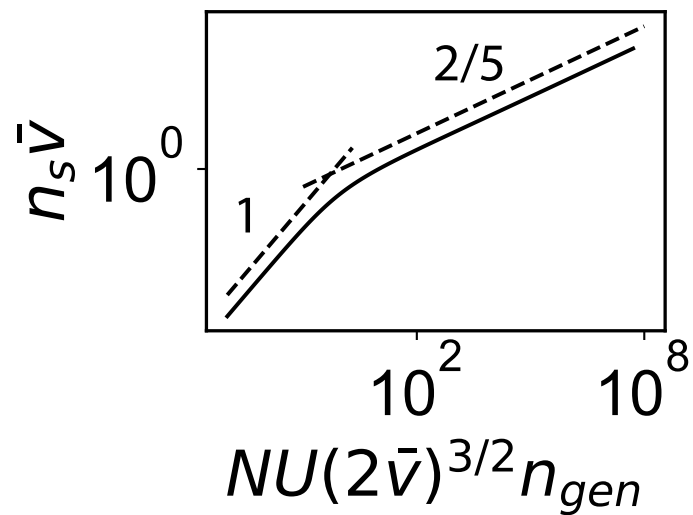

Supplement: supp [file elife-64740-supp-v1.zip]
